# Supplementary material for: Molecular Signatures Discriminating the Male and the Female Sexual Pathways in the Pearl Oyster Pinctada margaritifera
Source: PLoS One. 2015 Mar 27;10(3):e0122819. doi: 10.1371/journal.pone.0122819 (PMC4376701; doi:10.1371/journal.pone.0122819)
Supplement: S1 Table — (XLSX) [file pone.0122819.s001.xlsx]

## Sheet: Feuil1
Contig	Gene name	Genbank Accession number	Protein name	Category	ID Primer	F vs R	Sequence	Lenght	Tm	GC%	Product size	Efficiency (%)
Contig_43072	pmarg-foxl2	KJ907378	Forkhead box L2	FP	FOXL2_1S	F	TCCGGATCACAGTGTCTCAG	20	59.82	55	140	106.9
					FOXL2_1AS	R	GACAGCAACGCACAGAATGT	20	59.91	50
Contig_43476	pmarg-c43476	KM874285	Unknown gene product	FP	C43476_VF_1S	F	ACCCTTACCAATCACCCTGC	20	59.67	55	106	92.6
					C46476_VF_1AS	R	TAACCAGGCCCGGGACTAT	19	59.68	57.89
Contig_45042	pmarg-c45042	KM874286	Unknown gene product	FP	C45042_VF_2S	F	GAGTGGAAGCAAGACAGACCA	21	59.93	52.38	237	102.6
					C45042_VF_2AS	R	TCCCAGAGGTTGCCAGAATAC	21	59.44	52.38
Contig_19309	pmarg-c19309	KM874287	Unknown gene product	eVF	C19309_NFMRF_2S	F	GATGCACTAGACACGCCTGA	20	59.83	55	113	96.2
					C19309_NFMRF_2AS	R	ACATGGATCTCTGTAACGCGT	21	59.52	47.62
Contig_54338	pmarg-c54338	KM874288	Unknown gene product	eVF	C54338_NFMRF_1S	F	CGTCTTCTCTAATTCACG	18	60.46	44.44	196	100.3
					C54338_NFMRF_1AS	R	CAGTACACACCATGATTGA	19	60.78	42.11
Contig_15150	pmarg-vit6	KM874283	Vitellogenin-6	F	Vit-6_2S	F	GTCCGCCCAGTAAACAAAGA	20	60.11	50	128	97.3
					Vit-6_2AS	R	CAATGTTGGTCCAGCTTCCT	20	60.11	50
Contig_25360	pmarg-zglp1	KM874284	GATA-type zinc finger protein 1	F	ZGLP1_4S	F	AGGCTTCTTTGTCAGACCACA	21	59.51	47.62	143	104.4
					ZGLP1_4AS	R	GTGCTGAGAGATGTGATCCCA	21	59.52	52.38
Contig_639	pmarg-dmrt	KJ907374	Doublesex- and mab-3-related transcription factor	MP	Dmrt_2S	F	AACCTCTGGGTGACAACTGG	20	60	55	123	97.9
					Dmrt_2AS	R	ATCCAGGACCACAGGTTCAG	20	59.96	55
Contig_1317	pmarg-fem1-like	KJ907377	Fem1-like protein	MP	FEM-1_4S	F	ACTCCACAACCAGCTTTCACA	21	60.06	47.62	127	99.6
					FEM-1_4AS	R	GTGCCGATGTGACACTGAGA	20	60.04	55
Oyster_90c_12 or Contig_237	ef1a	-	Elongation factor 1 A	Reference	EF1a5_S	F	CCACGAGTCCTTACCAGAGG	20	59.7	60	115	99.3
					EF1a5_AS	R	TGGATCACTTTTGCTGTCTCC	21	60.2	47.6
Oyster_90c_488 or Contig_2251	gapdh1	-	Glyceraldehyde 3 phosphate dehydrogenase 1	Reference	GAPDH1_S	F	AGGCTTGATGACCACTGTCC	20	60.1	55	181	99.8
					GAPDH1_AS	R	AGCCATTCCCGTCAACTTC	19	60.1	52.6
